# Supplementary material
Source: PubMed Central journal article supplement (PMC5613836)
Supplement: jp7b06475_si_001.pdf [file jp7b06475_si_001.pdf]

## Supporting Information

### **Signaling-Related Mobility Changes in Bacterial Chemotaxis Receptors Revealed**

**by Solid-State NMR**

Maryam Kashefi and Lynmarie K. Thompson\*

Department of Chemistry, University of Massachusetts Amherst, 710 N Pleasant St, Amherst,  
Massachusetts, 01003, USA

\*Department of Chemistry, 122 LGRT, 710 North Pleasant St, University of Massachusetts  
Amherst, Amherst, MA, 01003, USA. E-mail: [Thompson@chem.umass.edu](mailto:Thompson@chem.umass.edu), Telephone: (413)  
545-0827

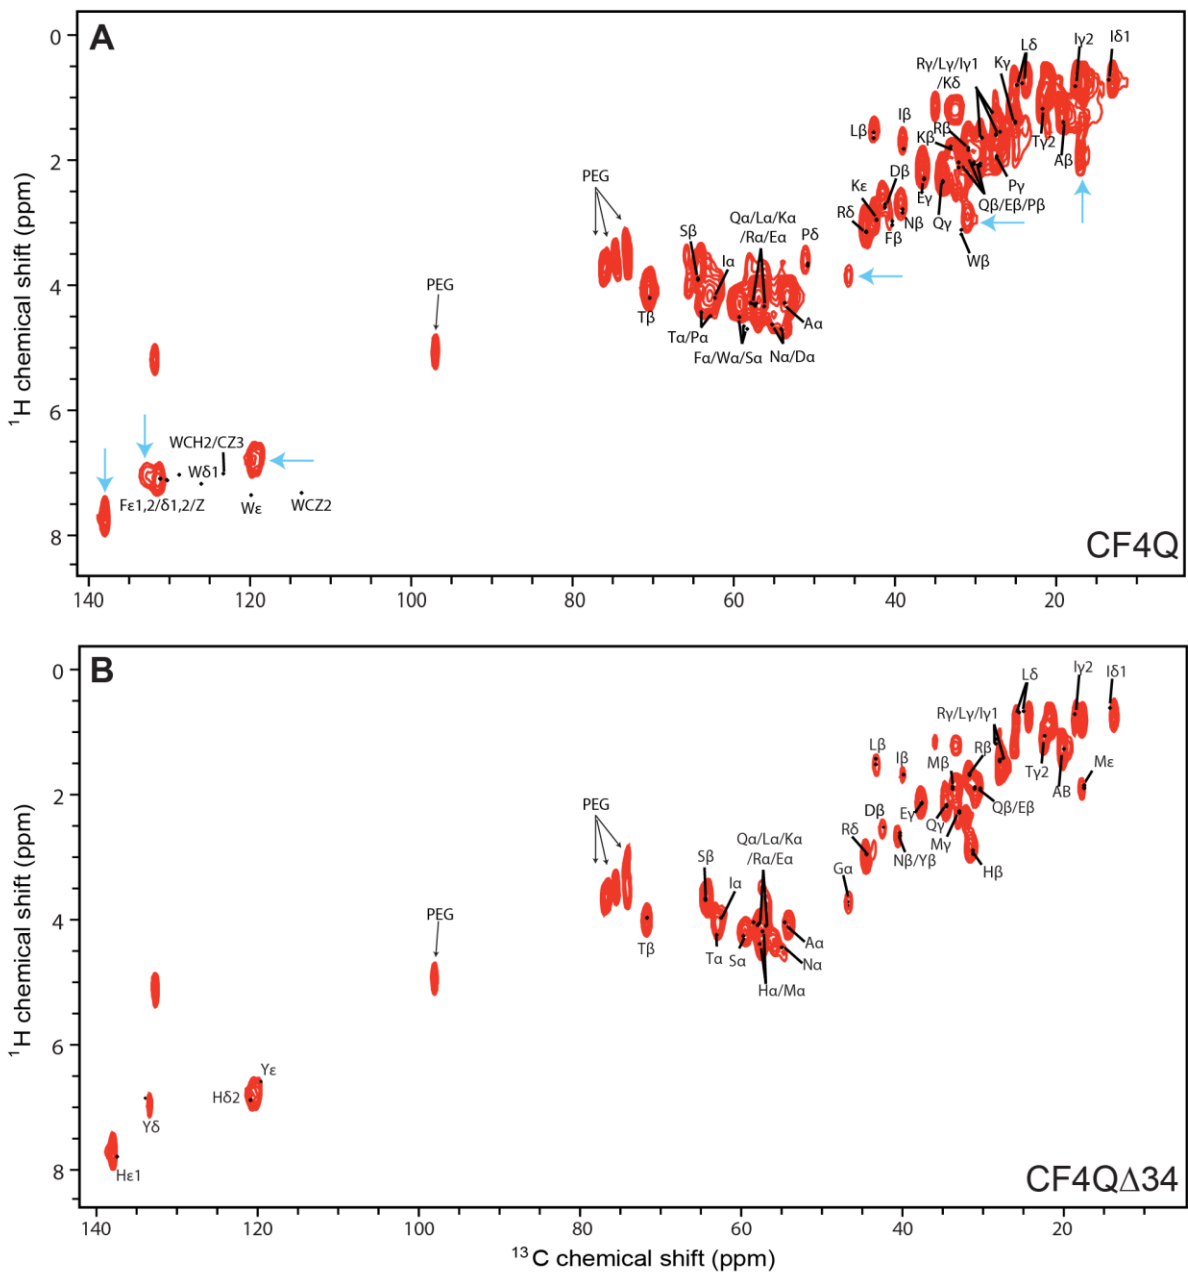

**Figure S1.**  $^1\text{H}$ - $^{13}\text{C}$  INEPT spectra of (A)  $\text{U-}^{13}\text{C}$ ,  $^{15}\text{N}$ -CF4Q and (B)  $\text{U-}^{13}\text{C}$ ,  $^{15}\text{N}$ -CF4Q $\Delta$ 34 in PEG-mediated functional arrays with Che A and CheW. Spectra are shown at comparable contour levels. CF4Q spectrum has more intensity for most of the peaks except for residues which are not found in the tail (cyan arrows, His, Tyr, Gly, and Met). same NMR condition as Figure 6.

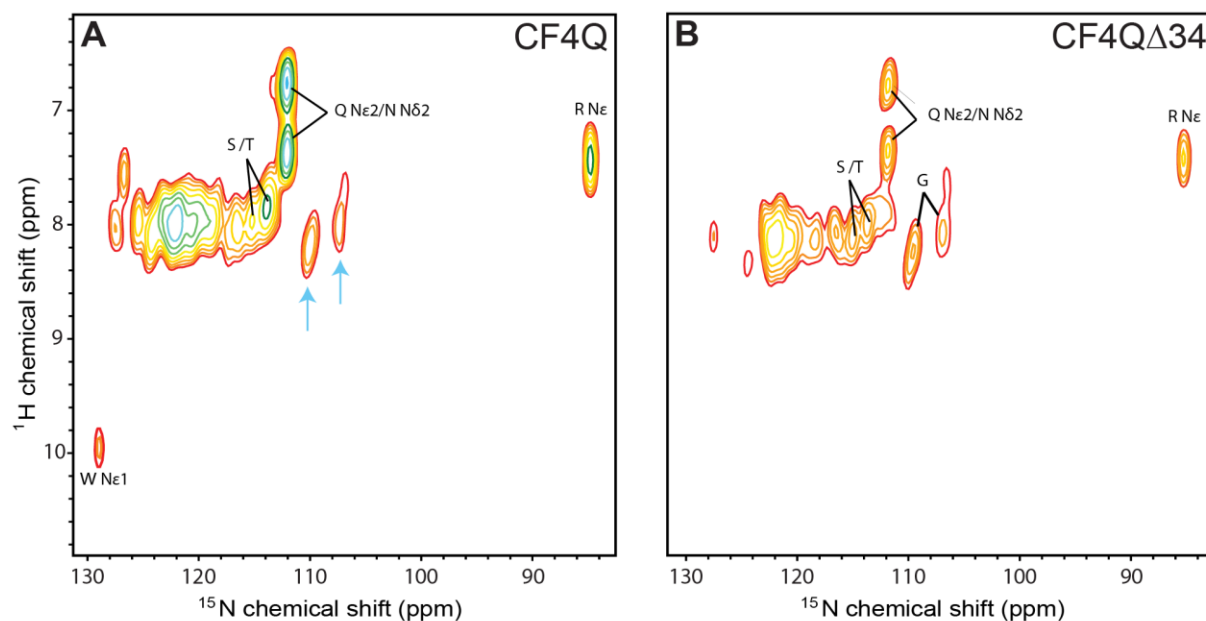

**Figure S2.**  $^1\text{H}$ - $^{15}\text{N}$  INEPT spectra of (A)  $\text{U-}^{13}\text{C}$ ,  $^{15}\text{N}$ -CF4Q and (B)  $\text{U-}^{13}\text{C}$ ,  $^{15}\text{N}$ -CF4Q $\Delta$ 34 in PEG-mediated functional arrays with Che A and CheW. Assigned residue types are based on average chemical shifts tabulated in the BMRB. (A) CF4Q spectra contain the expected resonances for the mobile of C-terminal tail, but also contain resonances for Gly which is not in the tail. (B) CF4Q $\Delta$ 34 spectra demonstrate there is another mobile region besides the tail. Same NMR conditions as Figure S1.

**Table S1.** PCR Primers used for plasmid construction.

| Construct        | PCR Primers                                                                                                                 |
|------------------|-----------------------------------------------------------------------------------------------------------------------------|
| HisTev-CheY      | F:5'CATCATCACCACCATCACGAAAACCTGTATTTTCAGGGAGCGGA<br>TAAAGAACTTAAATTTTGG 3'<br>R:5'GTGGCGGCCGCTCTATTACATGCCAGTTTCTCAAAGAT 3' |
| His-Tev-CheA     | F:5'<br>CATCATCACCACCATCACGAAAACCTGTATTTTCAGGGAAGCATGGATATA<br>AGCG 3'<br>R:5' GGCCGCTCTATTAGGCGGCGGTGTTTCGCCATACG 3'       |
| His-Tev-CheW     | F:5'CATCATCACCACCATCACGAAAACCTGTATTTTCAGGGAACCGGT<br>ATG ACGAATGTAAC 3'<br>R:5'GGCGGCCGCTCTATTACGCCACTTCTGACG C 3'          |
| CF4Q $\Delta$ 34 | F: 5'-TGACGAGTATTTACTAACGCG -3'<br>R: 5'- GTTAGTAAATACTCGTCATGGGCTGGCTGCCAGACG -3'                                          |
| CF4Q.A411V       | F: 5'- GTCGCAGCGCCCAGGTGGCAAAG -3'<br>R: 5'- CTTTGATCTCTTTTGCCACCTGGGCGC -3'                                                |

**Table S2.** Peak volumes in 2D  $^1\text{H}$ - $^{13}\text{C}$  INEPT of  $^{13}\text{C}^{15}\text{NCF4Q}$  and  $^{13}\text{C}^{15}\text{NCF4Q}\Delta 34$  assembled with CheA and CheW into functional native-like arrays with PEG.<sup>a</sup>

| Residue/s                        | $\omega_1/{}^1\text{H}$ | $\omega_2/{}^{13}\text{C}$ | CF4Q<br>volume <sup>b</sup> | CF4Q $\Delta$ 34<br>volume <sup>b</sup> | Mobile<br>region<br>residues | <i>CF4Q –<br/>CF4Q<math>\Delta</math>34<br/>= <math>\Delta</math>34<br/>volume</i> | <i><math>\Delta</math>34<br/>residues</i> |
|----------------------------------|-------------------------|----------------------------|-----------------------------|-----------------------------------------|------------------------------|------------------------------------------------------------------------------------|-------------------------------------------|
| Total C $\alpha$                 |                         |                            | 86.1                        | <b>53.9</b>                             | <b>51</b>                    | 32.2                                                                               | 34                                        |
| Arg N $\epsilon$                 | 7.3                     | 84.9                       | 6.3                         | <b>3.1</b>                              | <b>3</b>                     | 3.2                                                                                | 3                                         |
| Asn C $\beta$ +<br>Tyr C $\beta$ | 2.6                     | 39.1                       | 3.9                         | <b>2</b>                                | <b>1 Asn,<br/>1 Tyr</b>      | 1.9                                                                                | 2 Asn                                     |
| Glu C $\gamma$                   | 2.2                     | 36.3                       | 8.1                         | <b>4.3</b>                              | <b>5</b>                     | 3.7                                                                                | 3                                         |
| Gly C $\alpha$                   | 4.0                     | 45.4                       | 2.5                         | <b>2.8</b>                              | <b>3</b>                     | -0.3                                                                               | 0                                         |
| Gly N                            | 8.6,<br>8.3             | 110.4,<br>107.8            | 3.5                         | <b>3.5</b>                              | <b>3</b>                     | 0                                                                                  | 0                                         |
| His C $\beta$                    | 3.1                     | 29.7                       | 5.6                         | <b>5.4</b>                              | <b>1</b>                     | 0.2                                                                                | 0                                         |
| His C $\epsilon$ 1               | 7.8                     | 138.4                      | 4.8                         | <b>4.6</b>                              | <b>1</b>                     | 0.2                                                                                | 0                                         |
| Ile C $\beta$                    | 1.8                     | 38.7                       | 3                           | <b>1.7</b>                              | <b>2</b>                     | 1.3                                                                                | 1                                         |
| Ile C $\delta$ 1                 | 0.8                     | 13.0                       | 3.7                         | <b>3.0</b>                              | <b>2</b>                     | 0.7                                                                                | 1                                         |
| Leu C $\beta$                    | 1.6                     | 42.2                       | 3.6                         | <b>1.7</b>                              | <b>3</b>                     | 1.9                                                                                | 2                                         |
| Met C $\beta$                    | 2.0                     | 17.1                       | 1.6                         | <b>2.2</b>                              | <b>1</b>                     | -0.6                                                                               | 0                                         |
| Phe*                             | 7.2                     | 131.8                      | 1.3                         | <b>0</b>                                | <b>0</b>                     | 1.3                                                                                | 1                                         |
| Pro C $\delta$                   | 3.7                     | 50.7                       | 1.6                         | <b>0</b>                                | <b>0</b>                     | 1.6                                                                                | 7                                         |
| Thr C $\beta$                    | 4.2                     | 69.8                       | 8.2                         | <b>4.5</b>                              | <b>6</b>                     | 3.7                                                                                | 3                                         |
| Trp N $\epsilon$                 | 10.0                    | 129.1                      | 1.0                         | <b>0</b>                                | <b>0</b>                     | 1.0                                                                                | 1.0                                       |
| Tyr C $\delta$ *                 | 7.1                     | 133.4                      | 1.2                         | <b>1.0</b>                              | <b>1</b>                     | 0.2                                                                                | 0                                         |

<sup>a</sup>Bold columns compare peak volumes to residues of the most probable 50-residue mobile region; italicized columns compare difference volumes to residues of the deleted 34-residue tail.

<sup>b</sup>All peak volumes are corrected for differences in nmol of CF in the sample. HC peak volumes are then calibrated based on Tyr C $\delta$  = 2 in the CF4Q $\Delta$ 34 PEG sample, and then normalized to the number of unresolved correlations contributing to the peak (5 for Phe and 2 for Tyr C $\delta$ ) so that the reported volume should correspond to the number of residues. HN peak volumes are calibrated based on Trp N $\epsilon$  = 1 in the CF4Q PEG sample.
